unct in the management of diabetic macular edema. *Am J Ophthalmol* 137:675–682, 2004

## The –8503 G/A Polymorphism of the Adiponectin Receptor 1 Gene Is Associated With Insulin Sensitivity Dependent on Adiposity

**A**diponectin has beneficial effects on insulin sensitivity. Unexpectedly, adiponectin knockout mice exhibit no or only mild insulin resistance. Nevertheless, under a high-fat/high-carbohydrate diet, severe insulin resistance was induced in those animals (1). Consistent with this, recent evidence (2) suggests that the relationship of adiponectin with insulin sensitivity is stronger with increasing adiposity. In addition, a haplotype in the adiponectin gene was associated with type 2 diabetes only in obese and morbidly obese subjects but not in lean subjects (3).

Single nucleotide polymorphisms (SNPs) of the genes encoding adiponectin receptor (ADIPOR) 1 and 2 were associated with type 2 diabetes (4) or prediabetes phenotypes (5) in some but not in all (6) studies. We found that the –8503 G/A SNP of the *ADIPOR1* gene was associated with insulin sensitivity (7). In a very recent study (6) in rather lean subjects with a mean BMI of 21 kg/m<sup>2</sup>, no associations with insulin sensitivity were found. In our study (7), subjects were more obese (BMI 26 kg/m<sup>2</sup>). This new information lead us to investigate whether the association of the –8503 G/A SNP of *ADIPOR1* with insulin sensitivity is modulated by adiposity. If this was the case, then this may partly explain the inconsistent results regarding SNPs of *ADIPOR1* and 2.

Recently reported data (7) from 502 nondiabetic Caucasians were analyzed. Insulin sensitivity was estimated from an oral glucose tolerance test and determined during a euglycemic-hyperinsulinemic clamp ( $n = 299$ ). Subjects were divided into two groups by the median percentage of body fat (PFAT). In the more obese group ( $n = 250$ , PFAT 27–55%), carriers of the –8503 A allele had lower insulin sensitivity estimated from

the oral glucose tolerance test using the formula proposed by Matsuda and DeFronzo (8) (G/G, G/A, and A/A:  $14.4 \pm 0.8$ ,  $11.9 \pm 0.9$ , and  $9.2 \pm 1.7$  arbitrary units, respectively,  $P = 0.003$ , ANOVA) and determined during the clamp ( $0.07 \pm 0.005$ ,  $0.06 \pm 0.005$ , and  $0.04 \pm 0.01 \mu\text{mol} \cdot \text{kg}^{-1} \cdot \text{min}^{-1} \cdot \text{pmol/l}^{-1}$ , respectively,  $P = 0.007$ ) compared with homozygous carriers of the G allele, independent of age, sex, and PFAT. In contrast, in the lean group ( $n = 252$ , PFAT 7–26%), no significant relationships were found (oral glucose tolerance test:  $24.6 \pm 1.0$ ,  $27.2 \pm 1.1$ , and  $23.0 \pm 2.4$ , respectively,  $P = 0.60$ ; clamp:  $0.13 \pm 0.006$ ,  $0.13 \pm 0.007$ , and  $0.12 \pm 0.016$ , respectively,  $P = 0.84$ ).

In summary, we show that the A allele of the –8503 G/A SNP of the *ADIPOR1* gene is associated with less insulin sensitivity only in more obese but not in lean individuals. This finding may be important for further studies on the relationships of genetic variants of *ADIPOR1* and possibly of *ADIPOR2* with metabolism.

KONSTANTINOS KANTARTZIS, MD  
ANDREAS FRITSCH, MD  
FAUSTO MACHICAO, PHD  
HANS-ULRICH HÄRING, MD  
NORBERT STEFAN, MD

From the Department of Internal Medicine, Division of Endocrinology, Metabolism and Pathobiochemistry, University of Tübingen, Tübingen, Germany.

Address correspondence to Norbert Stefan, MD, Department of Internal Medicine, Division of Endocrinology, Metabolism and Pathobiochemistry, University of Tübingen, Otfried-Müller-Str. 10, D-72076 Tübingen, Germany. E-mail: norbert.stefan@med.uni-tuebingen.de.

© 2006 by the American Diabetes Association.

### References

1. Maeda N, Shimomura I, Kishida K, Nishizawa H, Matsuda M, Nagaretani H, Furuyama N, Kondo H, Takahashi M, Arita Y, Komuro R, Ouchi N, Kihara S, Tochino Y, Okutomi K, Horie M, Takeda S, Aoyama T, Funahashi T, Matsuzawa Y: Diet-induced insulin resistance in mice lacking adiponectin/ACRP30. *Nat Med* 8:731–737, 2002
2. Martin LJ, Woo JG, Daniels SR, Goodman E, Dolan LM: The relationships of adiponectin with insulin and lipids are strengthened with increasing adiposity. *J Clin Endocrinol Metab* 90:4255–4259, 2005
3. Vasseur F, Helbecque N, Lobbens S, Vasseur-Delannoy V, Dina C, Clement K, Boutin P, Kadowaki T, Scherer PE, Froguel P: Hypoadiponectinaemia and high risk

of type 2 diabetes are associated with adiponectin-encoding (ACDC) gene promoter variants in morbid obesity: evidence for a role of ACDC in diabetes. *Diabetologia* 48:892–899, 2005

4. Dancott CM, Ott SH, Pollin TI, Reinhart LJ, Wang J, O'Connell JR, Mitchell BD, Shuldiner AR: Genetic variation in adiponectin receptor 1 and adiponectin receptor 2 is associated with type 2 diabetes in the Old Order Amish. *Diabetes* 54:2245–2250, 2005
5. Wang H, Zhang H, Jia Y, Zhang Z, Craig R, Wang X, Elbein SC: Adiponectin receptor 1 gene (ADIPOR1) as a candidate for type 2 diabetes and insulin resistance. *Diabetes* 53:2132–2136, 2004
6. Hara K, Horikoshi M, Kitazato H, Yamachi T, Ito C, Noda M, Ohashi J, Froguel P, Tokunaga K, Nagai R, Kadowaki T: Absence of an association between the polymorphisms in the genes encoding adiponectin receptors and type 2 diabetes. *Diabetologia* 48:1307–1314, 2005
7. Stefan N, Machicao F, Staiger H, Machann J, Schick F, Tschirner O, Spieth C, Weigert C, Fritsche A, Stumvoll M, Haring HU: Polymorphisms in the gene encoding adiponectin receptor 1 are associated with insulin resistance and high liver fat. *Diabetologia* 48:2282–2291, 2005
8. Matsuda M, DeFronzo R: Insulin sensitivity indices obtained from oral glucose tolerance testing. *Diabetes Care* 22:1462–1470, 1999

## Evaluation of a Diagnostic Algorithm for Hereditary Hemochromatosis in 3,500 Patients With Diabetes

**H**ereditary hemochromatosis may lead to hepatic cirrhosis, cardiomyopathy, diabetes, arthritis, and impotence (1,2). In the Caucasian population, *HFE* gene mutations (C282Y and H63D) are present in the majority of patients demonstrating phenotypic expression (3–6). Conversely, the clinical penetrance in mutation carriers is low (7).

In the precirrhotic stage, ~20% of hemochromatotic patients demonstrate hyperglycemia, with the prevalence increasing to >70% in the presence of liver cirrhosis (8). Two mechanisms contribute to the development of hyperglycemia and diabetes. Liver iron overload leads to insulin resistance, and the pancreatic  $\beta$ -cell iron accumulation results in cell damage and diminished insulin secretion (1). The
